# Supplementary material for: Photocurrent generation by photosystem 1 integrated in crosslinked redox hydrogels
Source: Royal Society of Chemistry journal article supplement (doi:10.1039/c1ee01126j), 2011-01-01
Supplement: c1ee01126j.pdf [file c1ee01126j.pdf]

## Supporting Information For

### Photocurrent generation by Photosystem 1 integrated in crosslinked redox hydrogels

Adrian Badura,<sup>1</sup> Dmitrii Guschin<sup>2</sup>, Tim Kothe<sup>1</sup>, Marta J. Kopczak<sup>1</sup>, Wolfgang  
Schuhmann<sup>2\*</sup> and Matthias Rögner<sup>1\*</sup>

<sup>1</sup>Plant Biochemistry (Faculty of Biology & Biotechnology), Ruhr-Universität Bochum,  
Universitätsstrasse 150, D-44780 Bochum, Germany, Fax: (+49)2343214322

<sup>2</sup>Analytische Chemie - Elektroanalytik & Sensorik (Faculty of Chemistry & Biochemistry),  
Ruhr-Universität Bochum, Universitätsstrasse 150, D-44780 Bochum, Germany Fax:  
(+49)2343214683

**\*Corresponding authors**

**Matthias Rögner**

Email: [matthias.roegner@rub.de](mailto:matthias.roegner@rub.de)

Wolfgang Schuhmann

E-mail: [wolfgang.schuhmann@rub.de](mailto:wolfgang.schuhmann@rub.de)

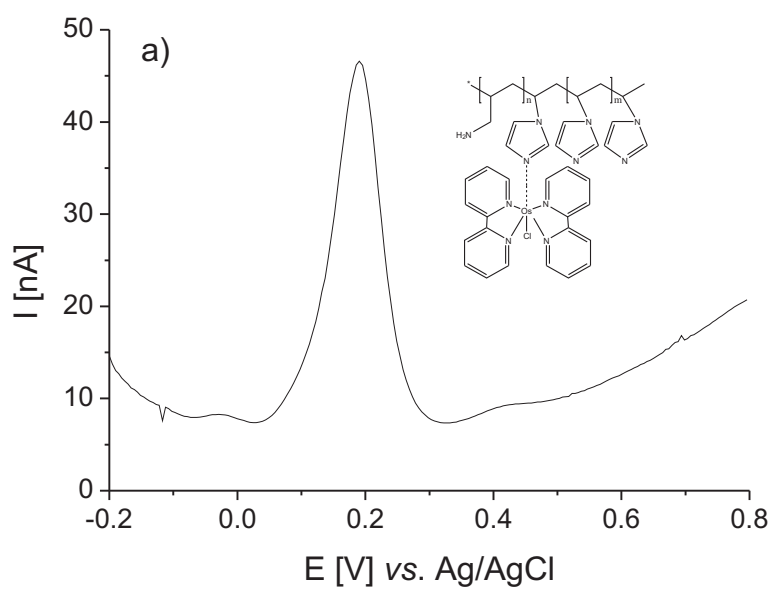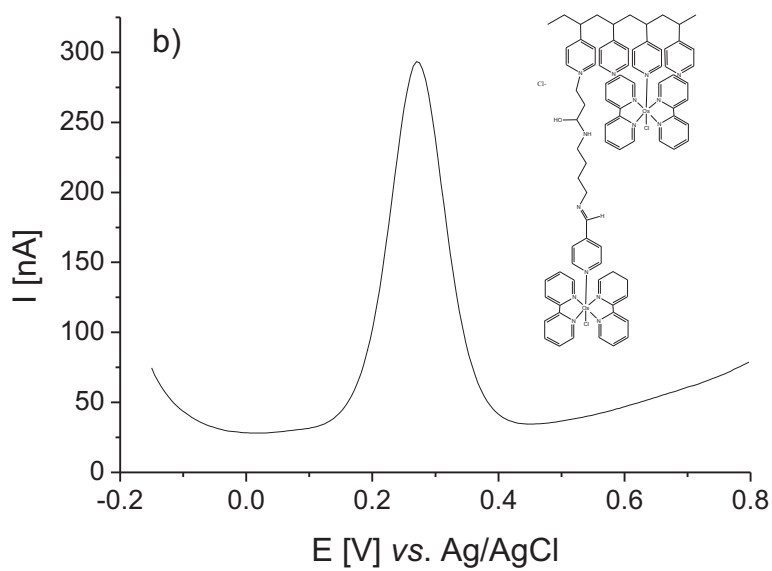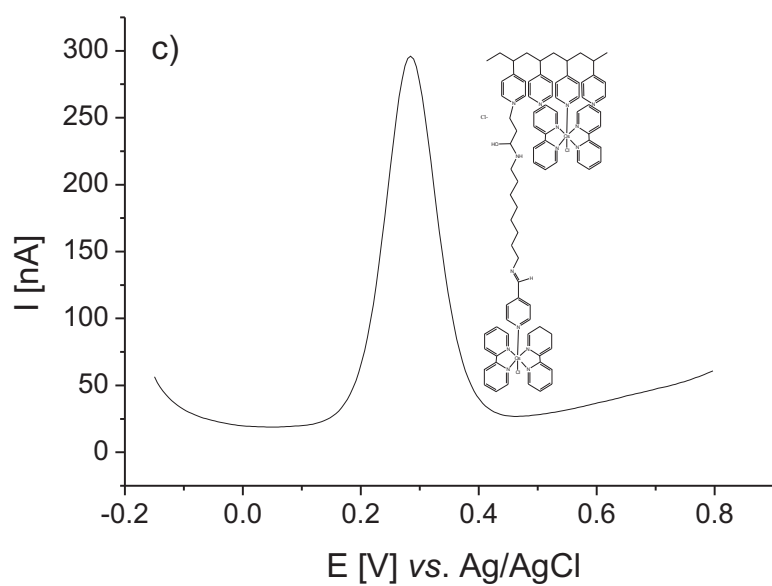

**Figure S1.** Differential pulse voltammograms of electrodes modified with Os-complex modified redox polymers with different polymer backbones and coordination shell of the Os complexes A) P1, B) P2, C), P3. The molecular structure is shown as inset (1 M KCl, step potential 49.5 mV, interval time 0.2 s, modulation amplitude 150 mV, modulation time 0.06).
